# Supplementary figures and images for: Selection to minimise noise in living systems and its implications for the evolution of gene expression
Source: PubMed Central journal article supplement — Mol Syst Biol. 2008 Mar 4;4:170. doi: 10.1038/msb.2008.11 (PMC2290932; doi:10.1038/msb.2008.11), 2008-03-04

# Supplementary Figure 1

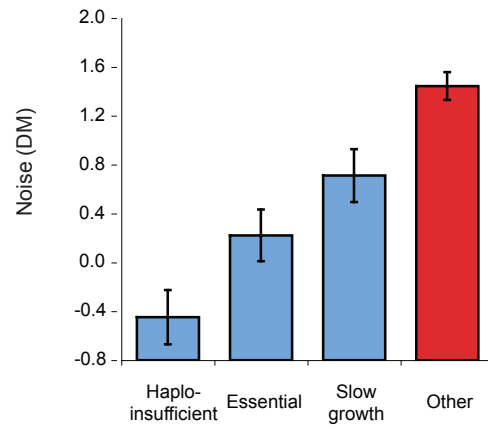

Supplement: msb200811-s1.pdf [file msb200811-s1.pdf]
